# Supplementary material for: Contrasting life history characteristics of the eightbar grouper Hyporthodus octofasciatus (Pisces: Epinephelidae) over a large latitudinal range reveals spawning omission at higher latitudes
Source: Oxford University Press journal article supplement (doi:10.1093/icesjms/fst020), 2013-02-19
Supplement: fst020_supplementary_data.zip [file fst020_supplementary_data.zip]

Archive with 1 entries (1 files):
- fst020supp.pdf
